# Supplementary material
Source: publisher figshare collection journal article supplement (https://tandf.figshare.com/articles/dataset/_/6993719)
Supplement: Supplementary file 1 [file 1]

Archive with 2 entries (2 files):
- igen_a_1491964_sm2664.pdf
- igen_a_1491964_sm2663.docx
